# Supplementary material
Source: publisher figshare collection journal article supplement (https://tandf.figshare.com/articles/dataset/_/5778159)
Supplement: Supplementary file 1 [file 2]

# Bayesian Diagnostic of Hidden Markov Structural Equation Models with Missing Data—Web Supplement Material

Jingheng Cai ([caijheng@mail.sysu.edu.cn](mailto:caijheng@mail.sysu.edu.cn)) is responsible for the web supplement. Please contact him for any questions and comments. The details of usage are as follows.

## (1) Setting Files

- `def_con.h`: The definition of the model.

| Notation       | Description                                                                                          |
|----------------|------------------------------------------------------------------------------------------------------|
| <b>NO</b>      | Sample size+1, e.g. $n = 1000$ , NO=1001.                                                            |
| <b>NT</b>      | Time points+1                                                                                        |
| <b>NC2</b>     | Number of hidden states+1                                                                            |
| <b>NY2</b>     | Dimension of the observed variables+1                                                                |
| <b>NK2</b>     | Dimension of latent variables+1                                                                      |
| <b>NM2</b>     | Dimension of dependent latent variables+1                                                            |
| <b>NZ2</b>     | Dimension of independent latent variables+1                                                          |
| <b>NB2</b>     | Number of terms in the structural equation+1                                                         |
| <b>NX</b>      | Dimension of discrete fixed covariates+1                                                             |
| <b>NP2</b>     | Total number of unknown parameters+1                                                                 |
| <b>MCAX</b>    | Total MCMC iterations                                                                                |
| <b>GNUM</b>    | Burn-in iterations                                                                                   |
| <b>SS</b>      | Thinning value                                                                                       |
| <b>sigmu</b>   | Prior precision (the inverse of variance) of the intercept                                           |
| <b>sigly</b>   | Prior precision of the factor loadings                                                               |
| <b>sigphi</b>  | Prior precision of the coefficients in the missing mechanism model                                   |
| <b>siggam</b>  | Prior precision of the coefficients related to the discrete fixed covariates in the transition model |
| <b>sigalp</b>  | Prior precision of the intercepts in the transition model                                            |
| <b>sigalp2</b> | Prior precision of the parameters related to the initial probabilities                               |

|                |                                                                 |
|----------------|-----------------------------------------------------------------|
| <b>RAN_PER</b> | Random permutation sampler: 1; otherwise: 0                     |
| <b>POS2</b>    | Location of the intercept for permutation sampler               |
| <b>MAR</b>     | Ignorable missing: 1; non-ignorable missing: 0                  |
| <b>NON</b>     | Nonlinear structural equation: 1; linear structural equation: 0 |

- ind.txt: The indicator file.
  - The indicator matrix of the factor loading matrix. 1 for free parameters and 0 for fixed parameters.
- Prior.txt: Prior specification file. For  $s = 1, \dots, S$  rows,
  - The location hyperparameters,  $\tilde{\alpha}_{sj}$ , for  $\psi_{sj}$ ,  $j = 1, \dots, p$ .
  - The shape hyperparameters,  $\tilde{\beta}_{sj}$ , for  $\psi_{sj}$ ,  $j = 1, \dots, p$ .
  - The location hyperparameters,  $\tilde{\alpha}_{\delta sj}$ , for  $\psi_{\delta sj}$ ,  $j = 1, \dots, q_1$ .
  - The shape hyperparameters,  $\tilde{\beta}_{\delta sj}$ , for  $\psi_{\delta sj}$ ,  $j = 1, \dots, q_1$ .
  - The degree of freedom in Wishart distribution,  $\rho_s$ , for  $\Phi_s^{-1}$ .
  - The scale matrix (lower triangular matrix) in Wishart distribution,  $R_s$ , for  $\Phi_s^{-1}$ .
- Accept.txt: Tuning parameters to control the acceptance rate.
  - Tuning parameter for the coefficients related to the discrete fixed covariates in the transition model,  $\varphi$ .
  - Tuning parameters for the initial probabilities and intercepts in the transition model,  $\tau_s$  and  $\zeta_{us}$ ,  $u, s = 1, \dots, S$ .
  - Tuning parameters for the parameters in the missing mechanism.
  - Tuning parameters for the latent variables.
  - Tuning parameters for the missing observation  $y_{.j}$ ,  $j = 1, \dots, p$ .
- int.txt: Initial values for the MCMC algorithm.
  - The loading matrices,  $\Lambda_s$ ,  $s = 1, \dots, S$ .
  - The intercepts,  $\mu_s$ ,  $s = 1, \dots, S$ .

- The error variances in measurement equation,  $\psi_{sj}$ ,  $j = 1, \dots, p$ ;  $s = 1, \dots, S$ .
  - The coefficients in the structural equation  $\Gamma_s$ ,  $s = 1, \dots, S$ .
  - The error variances in structural equation,  $\psi_{\delta s, j}$ ,  $j = 1, \dots, q$ ;  $s = 1, \dots, S$ .
  - The covariance matrix (lower triangular matrix) of independent latent variables,  $\Phi_s$ ,  $s = 1, \dots, S$ .
  - The parameters in the non-ignorable missing mechanism.
- main.c: The main file.
    - Lines 258—260; 473—475: Nonlinear terms (XIB) in the structural equations. You may modify these terms according to your model.
  - tomeqa.c
    - Lines 26—28: Nonlinear terms (GXIB) in the structural equations. You may modify these terms according to your model.
  - calG2.c
    - Lines 37—42:  $G_s$  in the paper. You may modify this matrix according to your model.

## (2) Data Files

- YO.txt: Observed variable data files, the reading subscript order is  $i, t, j$ ,  $i = 1, \dots, n$ ;  $t = 1, \dots, T$ ;  $j = 1, \dots, p$ . Note: The missing entries should be given initial values beforehand.
- IYY.txt: Missing indicators corresponding to YO.txt.
- AZ.txt: Fixed covariates in the transition model.

## (3) Run the Program

- a) Prepare the data files: YO.txt, IYY.txt, and AZ.txt.
- b) Prepare the setting files and modify the settings according to your model.
- c) Compile main.c using g++ or any other C compilers to obtain main.exe or other

execute files (platform dependent) in your working directory.

d) Run main.exe or other execute files (platform dependent) to obtain the result files.

#### (4) Results Files

- EALP1.txt, EALP2.txt, ...: The estimates for the initial probabilities and intercepts in the transition model,  $\tau_s$  and  $\zeta_{us}$ ,  $u, s = 1, \dots, S$ .
- EBI1.txt, EBI2.txt, ...: The estimates for the unknown coefficients in the structural equations,  $\Gamma_s$ ,  $s = 1, \dots, S$ .
- EGAM1.txt, EGAM2.txt, ...: The estimates for the coefficients related to the discrete fixed covariates in the transition model,  $\varphi$ .
- ELY1.txt, ELY2.txt, ...: The estimates for the unknown elements in loading matrices,  $\Lambda_s$ ,  $s = 1, \dots, S$ .
- EMU1.txt, EMU2.txt, ...: The estimates for  $\mu_s$ ,  $s = 1, \dots, S$ .
- EPHI1.txt, EPHI2.txt, ...: The estimates for lower triangular matrix of  $\Phi_s$ ,  $s = 1, \dots, S$ .
- EPHIY1.txt, EPHIY2.txt, ...: The estimates for the unknown coefficients in the non-ignorable missing mechanism.
- EPSD1.txt, EPSD2.txt, ...: The estimates for  $\psi_{\delta,sj}$ ,  $j = 1, \dots, q$ ;  $s = 1, \dots, S$ .
- EPSX1.txt, EPSX2.txt, ...: The estimates for  $\psi_{sj}$ ,  $j = 1, \dots, p$ ;  $s = 1, \dots, S$ .
- The files with prefix "S": The standard error estimates for the corresponding parameters.
- log.txt: The log file containing the acceptance rate and the running time.
- FI\_S1.txt, FI\_S2.txt: The FI scores of the observations under perturbation schemes 1 and 2.
- FI\_stru.txt, FI\_miss.txt, FI\_tran.txt, FI\_prior.txt: The FI scores for the structural equation, the missing mechanism, the transition pattern, and the prior inputs.

---

This is the end of readme.
